# Supplementary material for: The Gpr1-regulated Sur7 family protein Sfp2 is required for hyphal growth and cell wall stability in the mycoparasite Trichoderma atroviride
Source: Springer Nature journal article supplement (doi:10.1038/s41598-018-30500-y), 2018-08-07

# **The Gpr1-regulated Sur7 family protein Sfp2 is required for hyphal growth and cell wall stability in the mycoparasite *Trichoderma atroviride***

Lea Atanasova<sup>1§</sup>, Sabine Gruber<sup>1\*</sup>, Alexander Lichius<sup>1\*</sup>, Theresa Radebner<sup>2</sup>, Leoni Abendstein<sup>1</sup>, Martin Münsterkötter<sup>3,4</sup>, Nancy Stralis-Pavese<sup>5</sup>, Paweł P. Łabaj<sup>5</sup>, David P. Kreil<sup>5</sup> and Susanne Zeilinger<sup>1,2§</sup>

1) Institute of Microbiology, University of Innsbruck, Innsbruck, Austria

2) Institute of Chemical, Environmental & Biological Engineering, TU Wien, Vienna, Austria

3) MIPS - Institute of Bioinformatics and Systems Biology, Helmholtz Zentrum München, Germany

4) Functional Genomics and Bioinformatics, Sopron University, Sopron Hungary

5) Chair of Bioinformatics, Boku University Vienna, Vienna, Austria

<sup>§</sup> Current address: Institute of Food Technology, University of Natural Resources and Life Sciences (BOKU), Vienna, Austria

<sup>§</sup>corresponding author: Susanne Zeilinger, [Susanne.zeilinger@uibk.ac.at](mailto:Susanne.zeilinger@uibk.ac.at)

\*these authors contributed equally to the manuscript

## Supplementary Data

Supplementary Table 1: Differently regulated genes

Supplementary Table 2: FunCat categories assigned to differently regulated genes

Supplementary Table 3: Oligonucleotides used

Supplementary Table 4: Primers for gene expression analysis

Supplementary Table 5: RT-qPCR quantification of selected genes

Supplementary Figure 1: Genomic environment of the *gpr1* gene

Supplementary Figure 2: Semi-quantitative expression analysis of chitinase genes

**Table S1:** List of *T. atroviride* genes whose transcription is significantly differently regulated comparing the responses of the *gpr1*-silenced mutant *gpr1* sil-8 and the WT to *R. solani*. The robustness of the combined evidence from multiple analyses is indicated by the aggregate rank (aRank; the lower the rank the more robust evidence is provided by the data). aLogFC (WT) and aLogFC (*gpr1*-si) show the average log fold-changes of the respective strains' response to the prey; aLogFC (WT-*gpr1*-si) represents the aLogFC of the *gpr1*-si mutants' response subtracted from the WT response (for details see the Methods section). Filtered models correspond to the protein IDs of the filtered models in the JGI DOE *T. atroviride* genome database.

Please see file "Supplementary Tables S1 to S5.xls"

**Table S2:** List of FunCat categories assigned to transcripts that were significantly differently regulated comparing the responses of the *gpr1* sil-8 mutant and the WT to *R. solani*. The most robustly identified categories with the lowest aggregate rank (aRank) are listed first. Aggregate enrichment score (r) values close to 1 and 0 annotate overrepresented and underrepresented categories, respectively. Aggregate direction (aDir) values close to 1 or -1 show good agreement across analysis variants with over- or underrepresentation of categories, whereas values close or equal to 0 mark poor or no agreement across the analyses, respectively. Aggregate significance (aSig) represents the percentage of analyses that inferred an under- or overrepresentation of categories with a probability larger than 90%. The yellow highlighted FunCat codes mark the highest level annotation categories. The functional categories tested correspond to the functional classification catalogue (FunCat) version 2.1 (<http://mips.helmholtz-muenchen.de/funcatDB/>) slightly adapted to version 2.0 as listed in Ruepp et al.<sup>61</sup>.

Please see file "Supplementary Tables S1 to S5.xls"

**Table S3:** Oligonucleotides used for cloning, genotypic verification, sequencing and generation of transformation cassettes.

Please see file "Supplementary Tables S1 to S5.xls"

**Table S4:** qPCR and RT-PCR primers for gene expression analysis used in this study.

| Gene         | Tm<br>[°C] | Primers (5'→ 3')       |                         | PE   |
|--------------|------------|------------------------|-------------------------|------|
|              |            | fw                     | rev                     |      |
| <i>sar1</i>  | 60         | CTCGACAATGCCGGAAGACC   | TTGCCAAGGATGACAAAGGGG   | 1    |
| <i>tef1</i>  | 58.5       | TACTATGTCACCGTCATTG    | CAGCGATAATCAGGATA       | 1    |
| <i>actin</i> | 60         | GCACGGAATCGCTCGTTGC    | TTCTCCACCACCGCCAAGC     | 1    |
| <i>ech42</i> | 60         | CGCAACTTCCAGCCTCAGAACC | TCAATACCATCGAAACCCAGTCC | 1    |
| <i>chs1</i>  | 57         | ACTCGGACCTCAATGGAA     | GGCGGCTATGAAGTAACG      | 0.9  |
| <i>chs2</i>  | 57         | TCCGACCATTCAATCTTC     | CCAGACTTGTAATCAGGAT     | 1    |
| <i>tac2</i>  | 55         | GCCCTCGTGCTCCATCAG     | GGTCTCGTAGTTGCCGGG      | 1    |
| <i>tac6</i>  | 55         | CGGGACTTATGGTTTGGGCGG  | CGAACGGTCCAGATGCGGG     | 1    |
| <i>hsp70</i> | 58         | GGTGCTACAGTCAAGTAA     | CCATAGGGAAAGAAACAAAG    | 1    |
| <i>tef2</i>  | 58         | AAGAAGTGGACCAAGAAC     | TCATAACAGCAGAGAAGAT     | 1    |
| <i>gh3</i>   | 58         | TATGAGAGCATCCTATCC     | AACACTAATGTAGCCTTC      | 1    |
| <i>coA</i>   | 60         | ATGTCGTTATTGCTTCTT     | CATTAAATGTGGAGGGTTA     | 1    |
| <i>sur4</i>  | 55.7       | TACACTTACTACTACTCTG    | AATGTATGTGATGAAGGA      | 0.96 |

**Table S5:** Real Time PCR quantification of selected genes for verification of microarray data.

| Gene                                      | Gene name    | Protein ID | Microarray data<br>[log <sub>2</sub> (ratio)] |                 | qPCR verification   |                 |
|-------------------------------------------|--------------|------------|-----------------------------------------------|-----------------|---------------------|-----------------|
|                                           |              |            |                                               |                 | Relative expression |                 |
|                                           |              |            | WT                                            | <i>gpr1</i> -si | WT                  | <i>gpr1</i> -si |
| Putative protein of HSP70 family          | <i>hsp70</i> | 284614     | -2.080                                        | 3.780           | 0.085               | 1.853           |
| Transcription elongation factor 2         | <i>tef2</i>  | 301275     | -4.020                                        | 1.350           | 0.026               | 1.363           |
| GH3 with Fibronectin type III-like domain | <i>gh3</i>   | 302027     | -3.630                                        | 0.980           | 0.003               | 14.806          |
| 3-hydroxyacyl-CoA dehydrogenase           | <i>coA</i>   | 80898      | 3.230                                         | 0.00006         | 2.580               | 0.239           |
| Putative SUR4 fatty acid elongase         | <i>sur4</i>  | 301574     | 1.890                                         | 0.080           | 4.448               | 0.127           |

**Figure S1:** The genomic environment of the *gpr1* gene in *T. atroviride* (TA), *T. virens* (TV) and *T. reesei* (TR) is conserved and includes *sfp2*, a gene coding for a Sur7 family protein with four transmembrane domains.

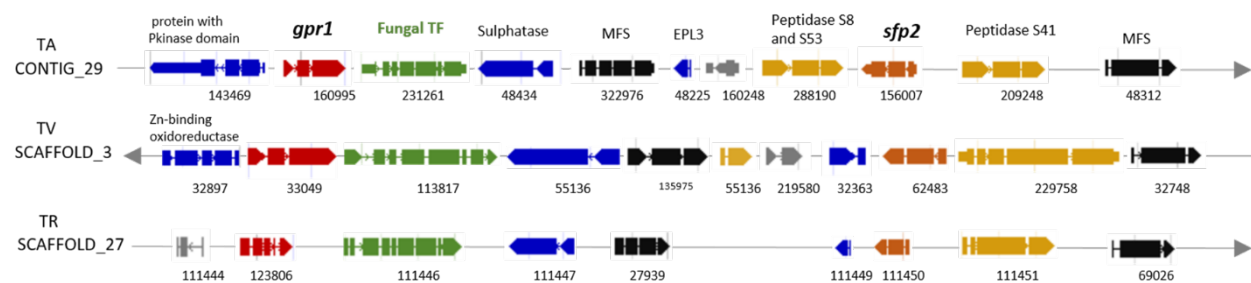

**Figure S2:** Semi-quantitative expression analysis of chitinase genes (A) *tac2* (Ta217701), (B) *tac6* (Ta214040) and (C) *ech42* (Ta131598) in *T. atroviride* WT, *sfp2* and *gpr1-si* mutants cultivated in liquid PDB medium with and without Congo Red as cell wall stress inducer. (D) The translation elongation factor1–encoding gene *tef1* was used as a control<sup>31</sup>.

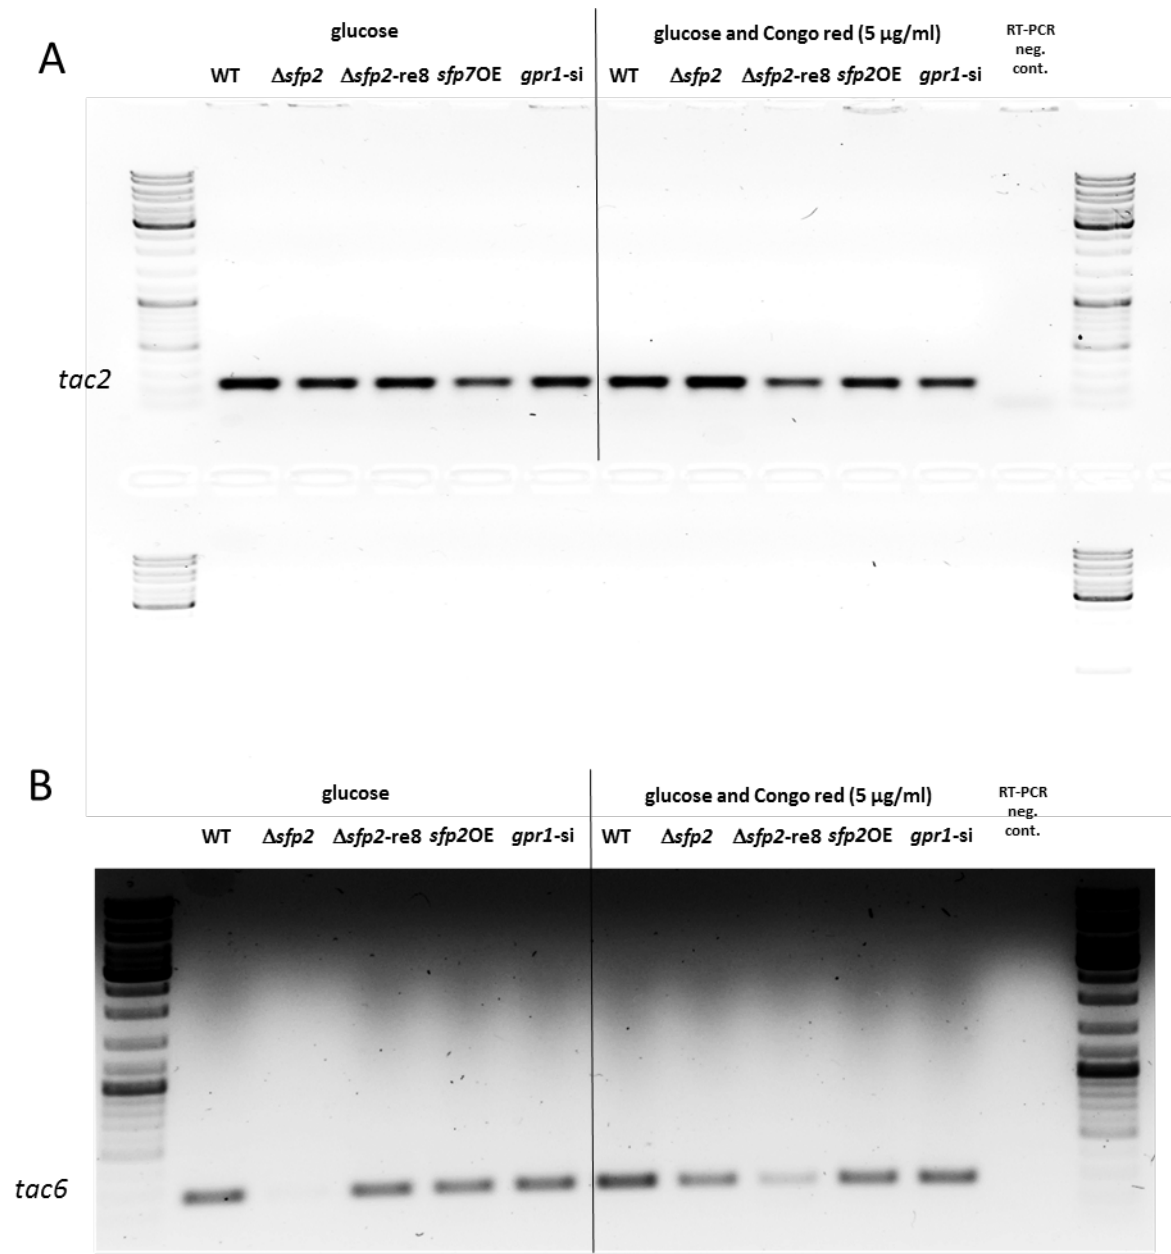

C

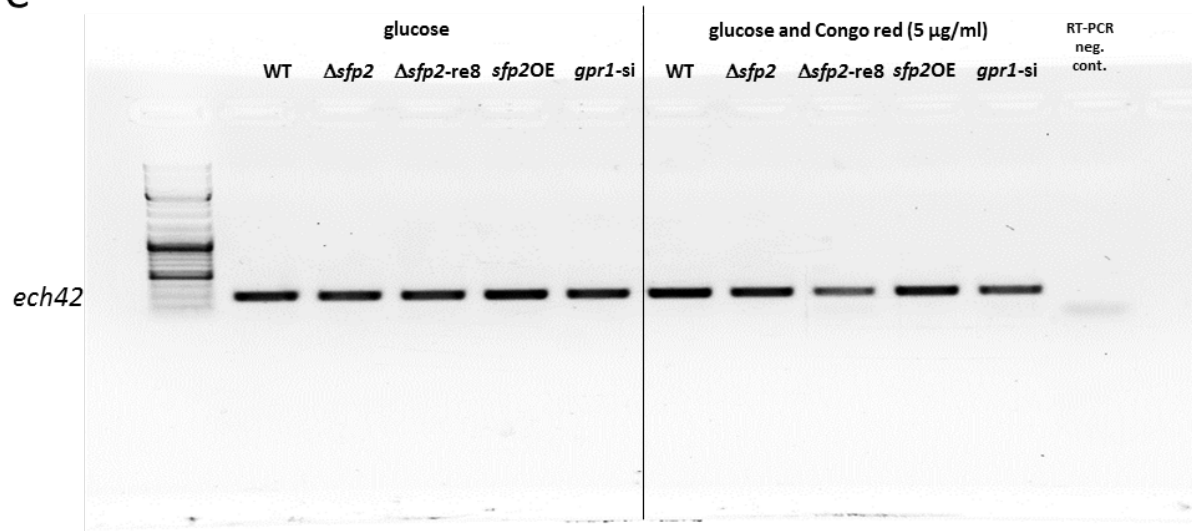

D

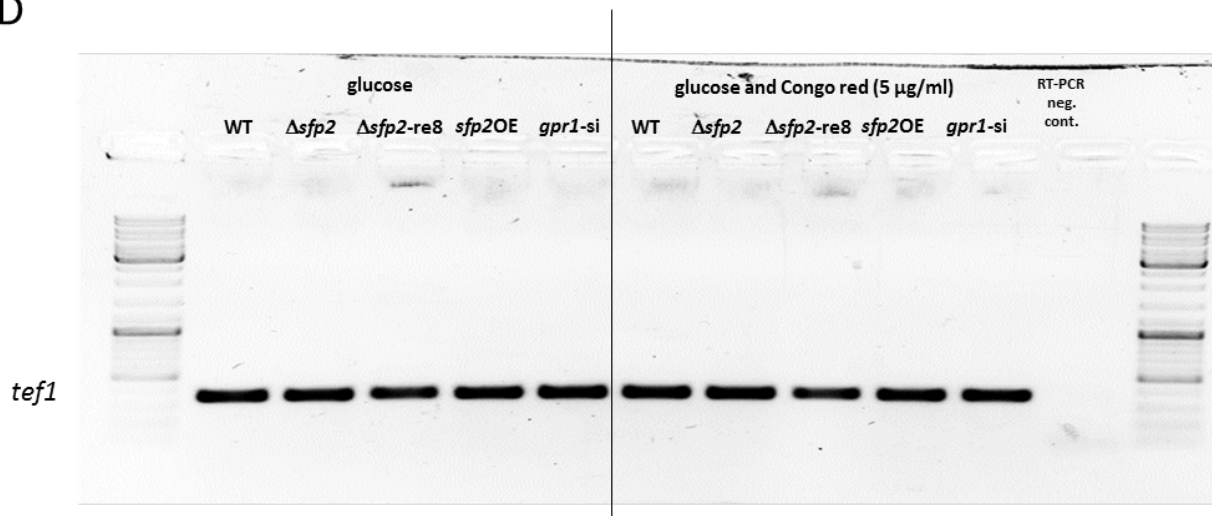

Supplement: MOESM1 [file 41598_2018_30500_MOESM1_ESM.pdf › 41598_2018_30500_MOESM1_ESM.pdf]
